# Supplementary figures and images for: Complementary and Alternative Medicine Use in Individuals Presenting for Care at a Comprehensive Cancer Center
Source: PubMed Central journal article supplement — Integr Cancer Ther. 2016 Jul 21;16(1):96–103. doi: 10.1177/1534735416660384 (PMC5736072; doi:10.1177/1534735416660384), 2016-07-21

Suppl Fig S1

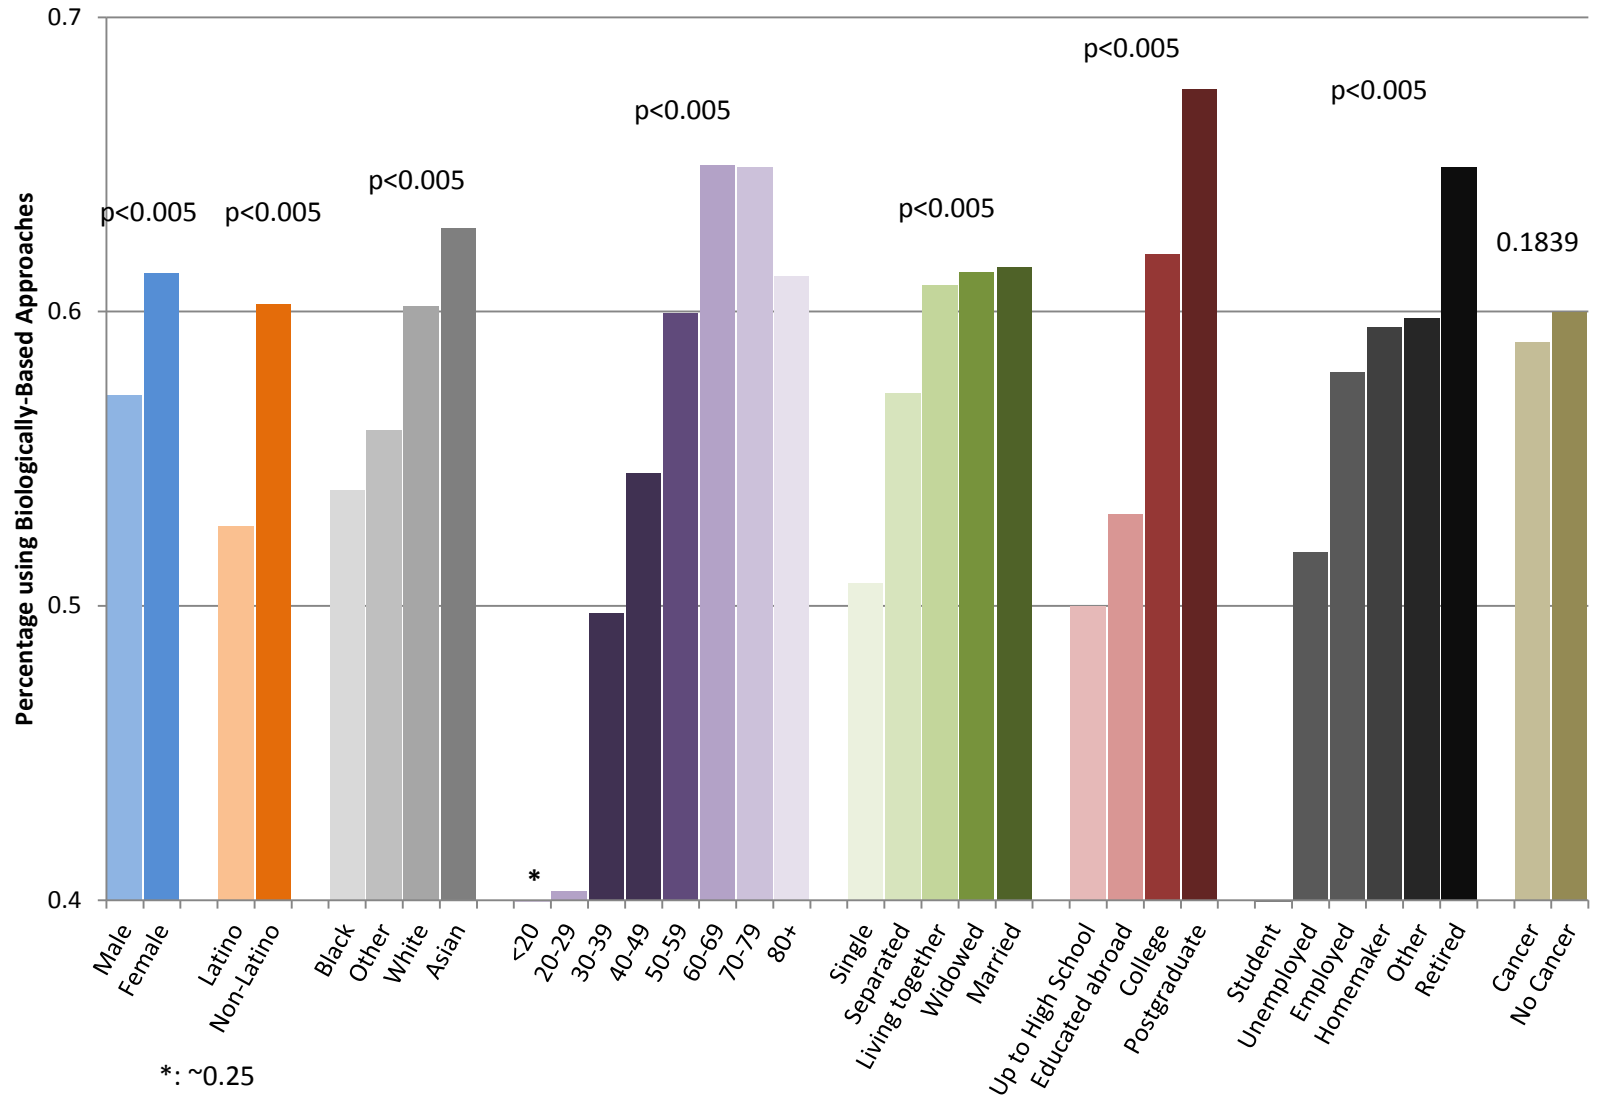

Suppl Fig S2

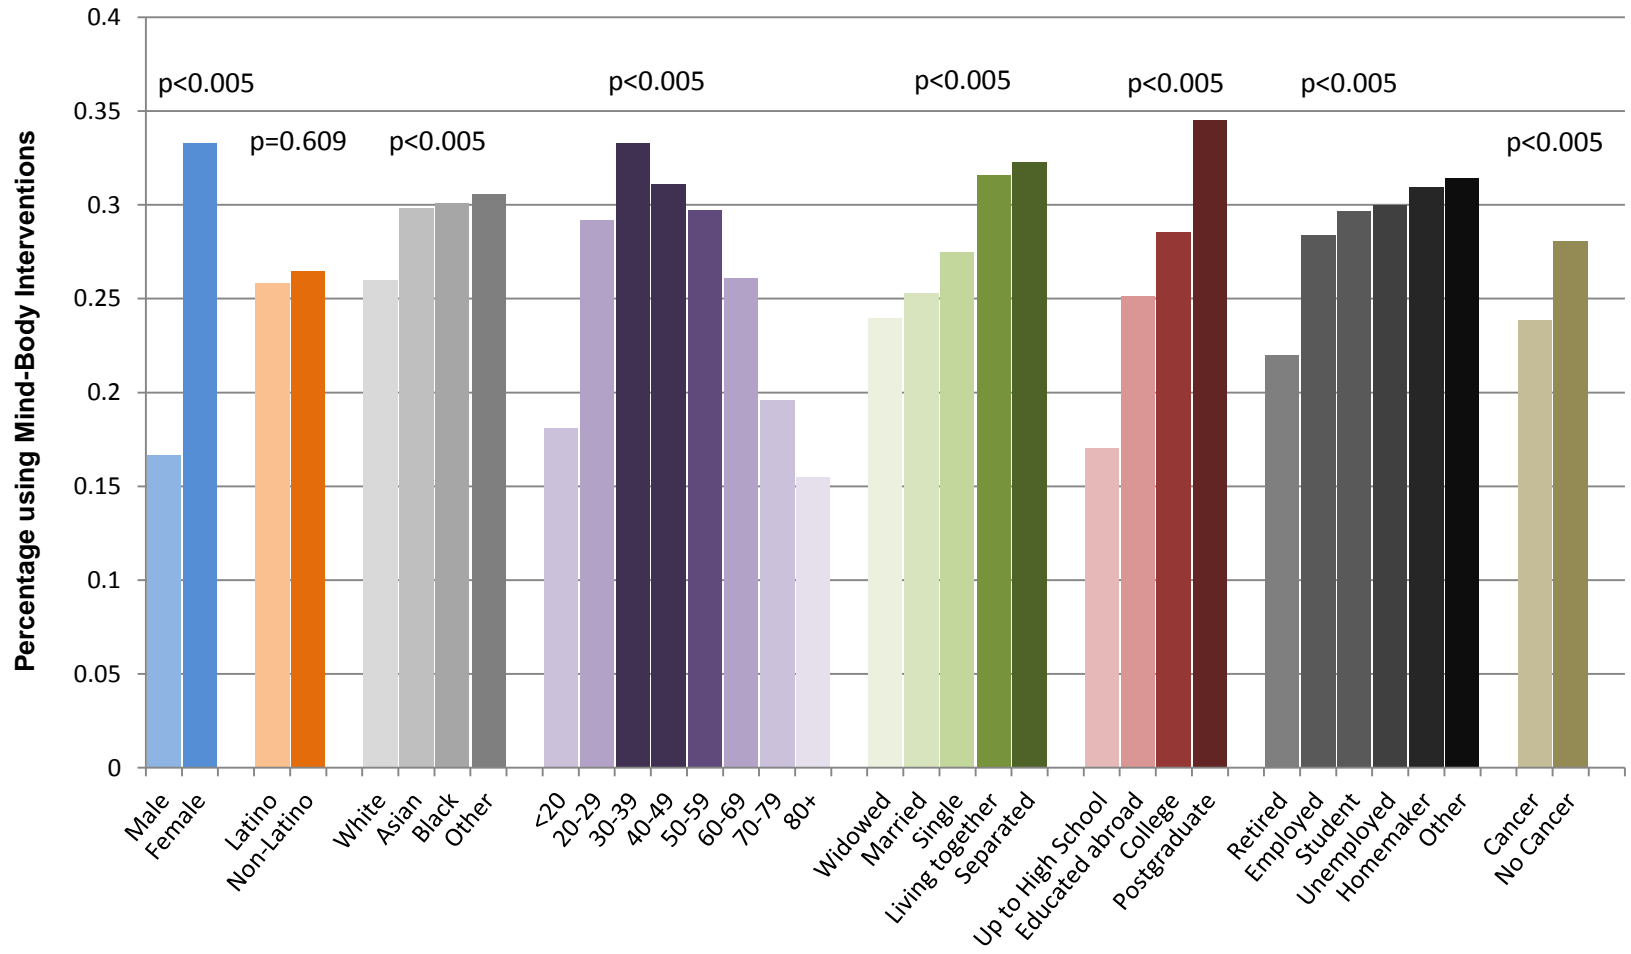

Suppl Fig S3

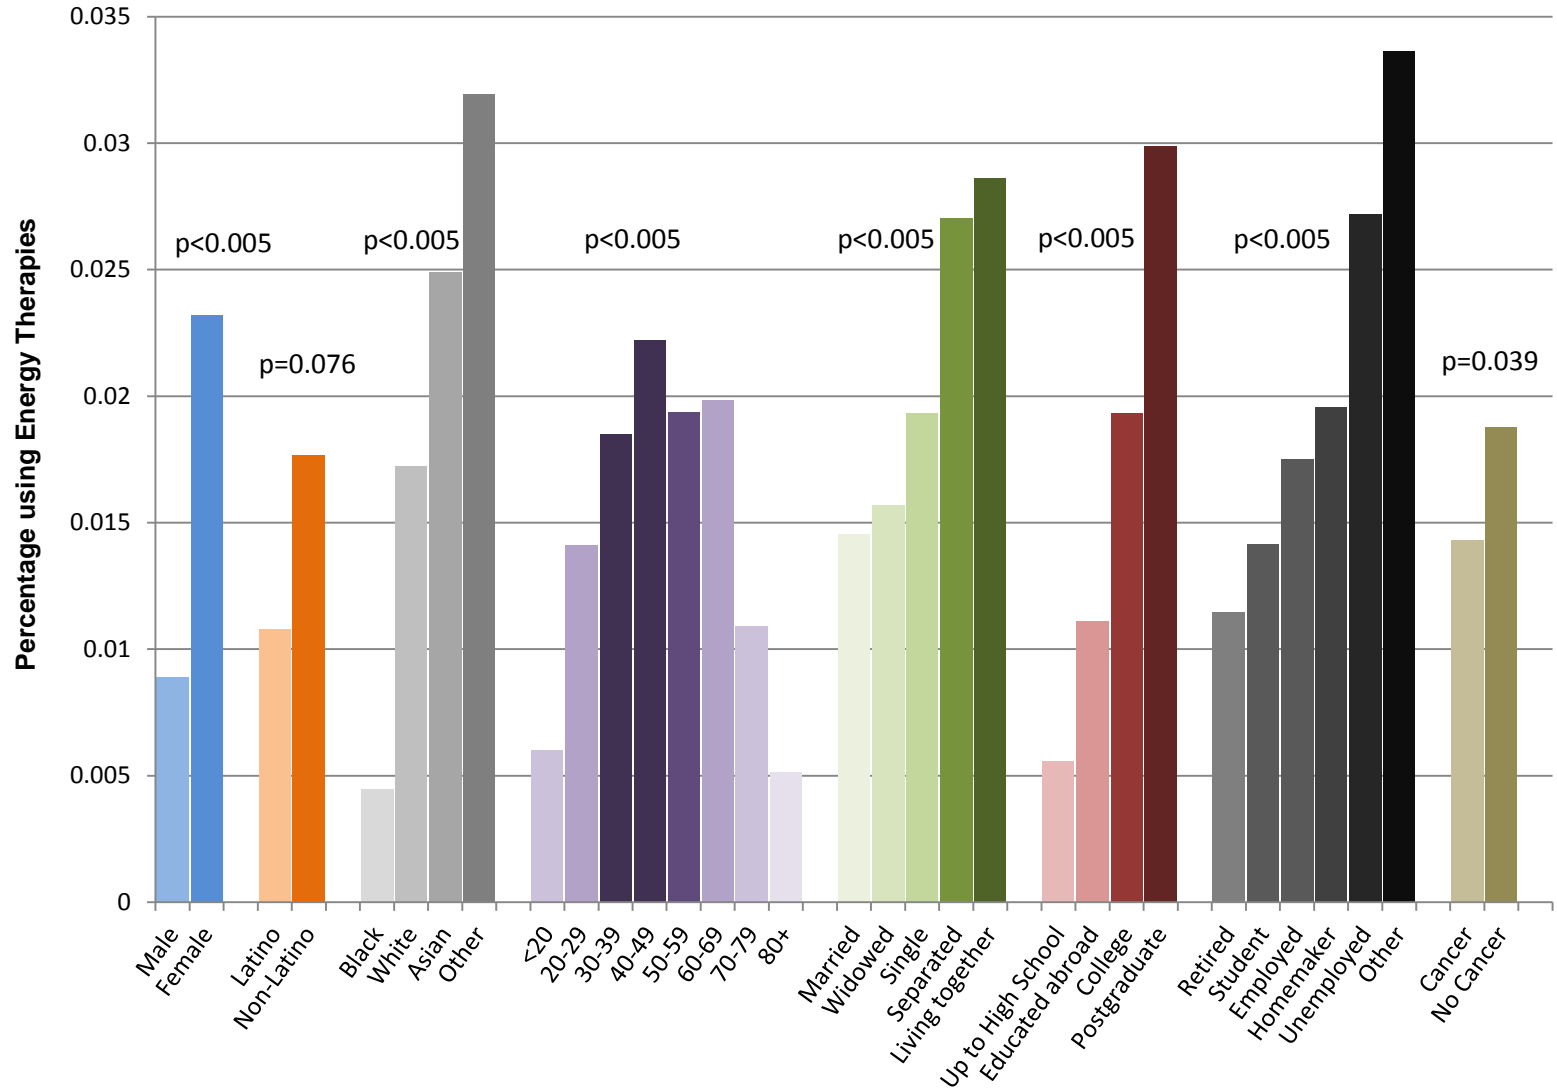

Suppl Fig S4

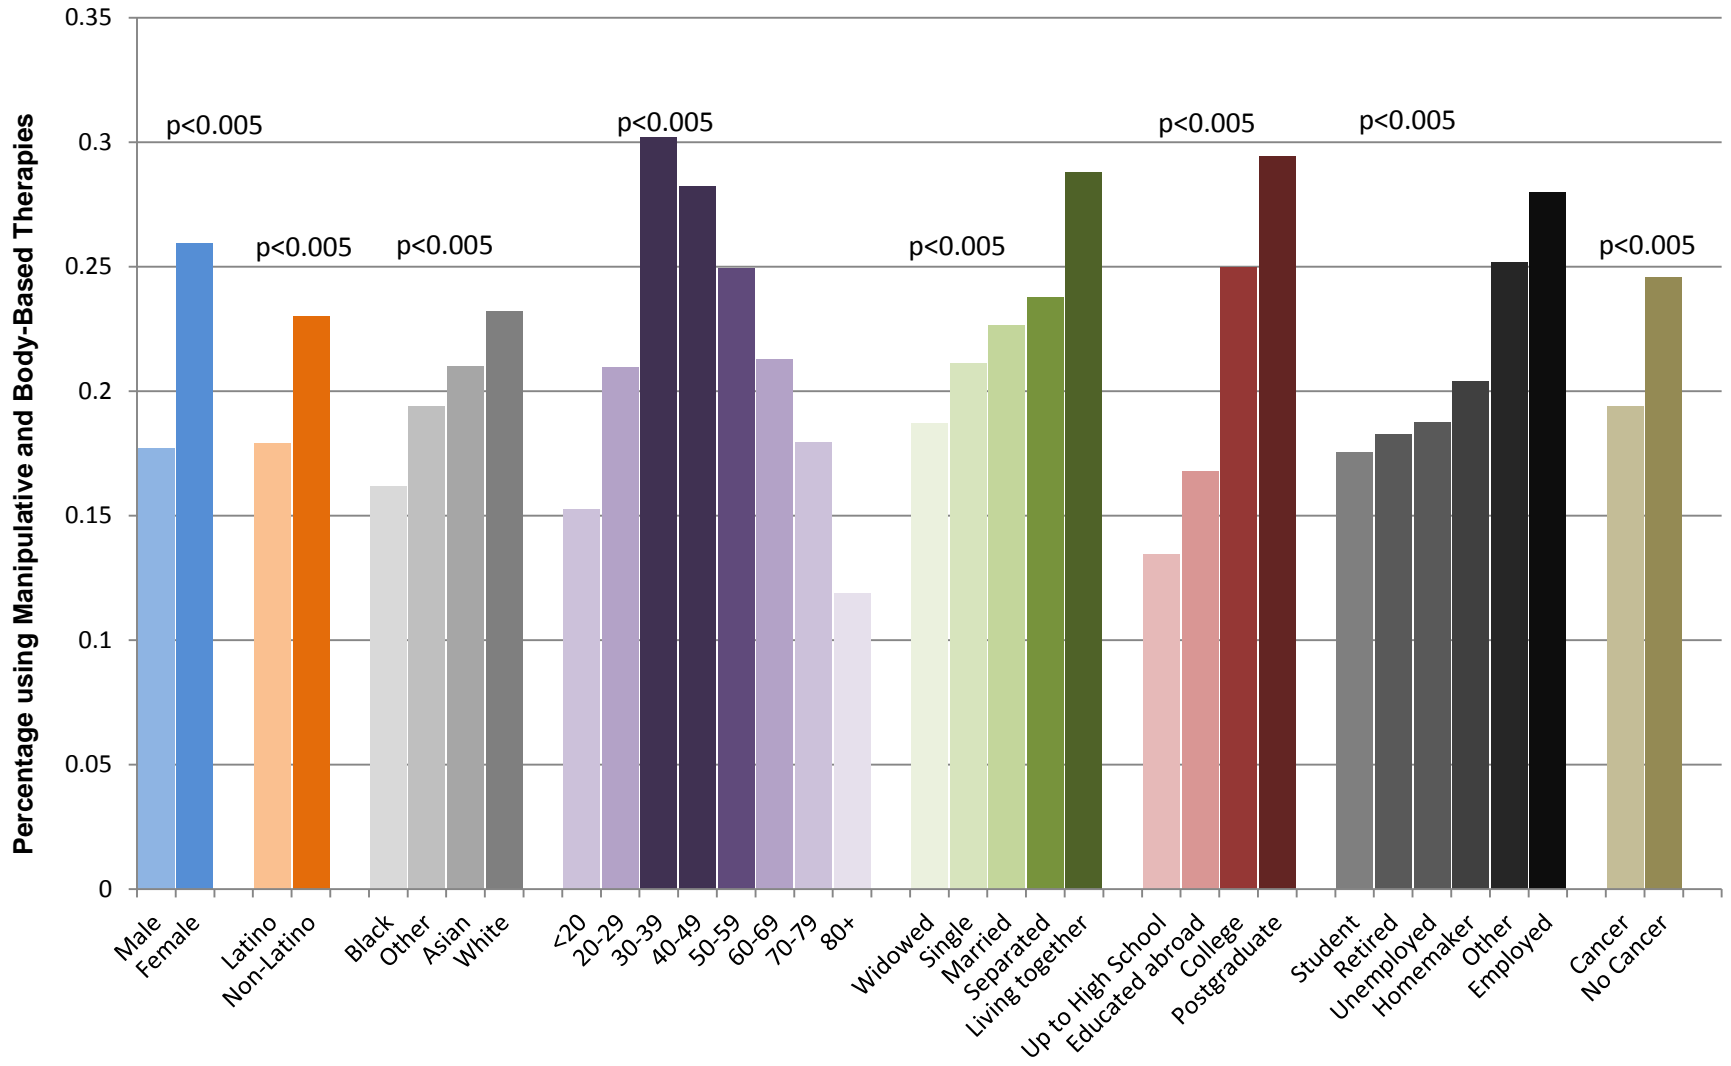

Suppl Fig S5

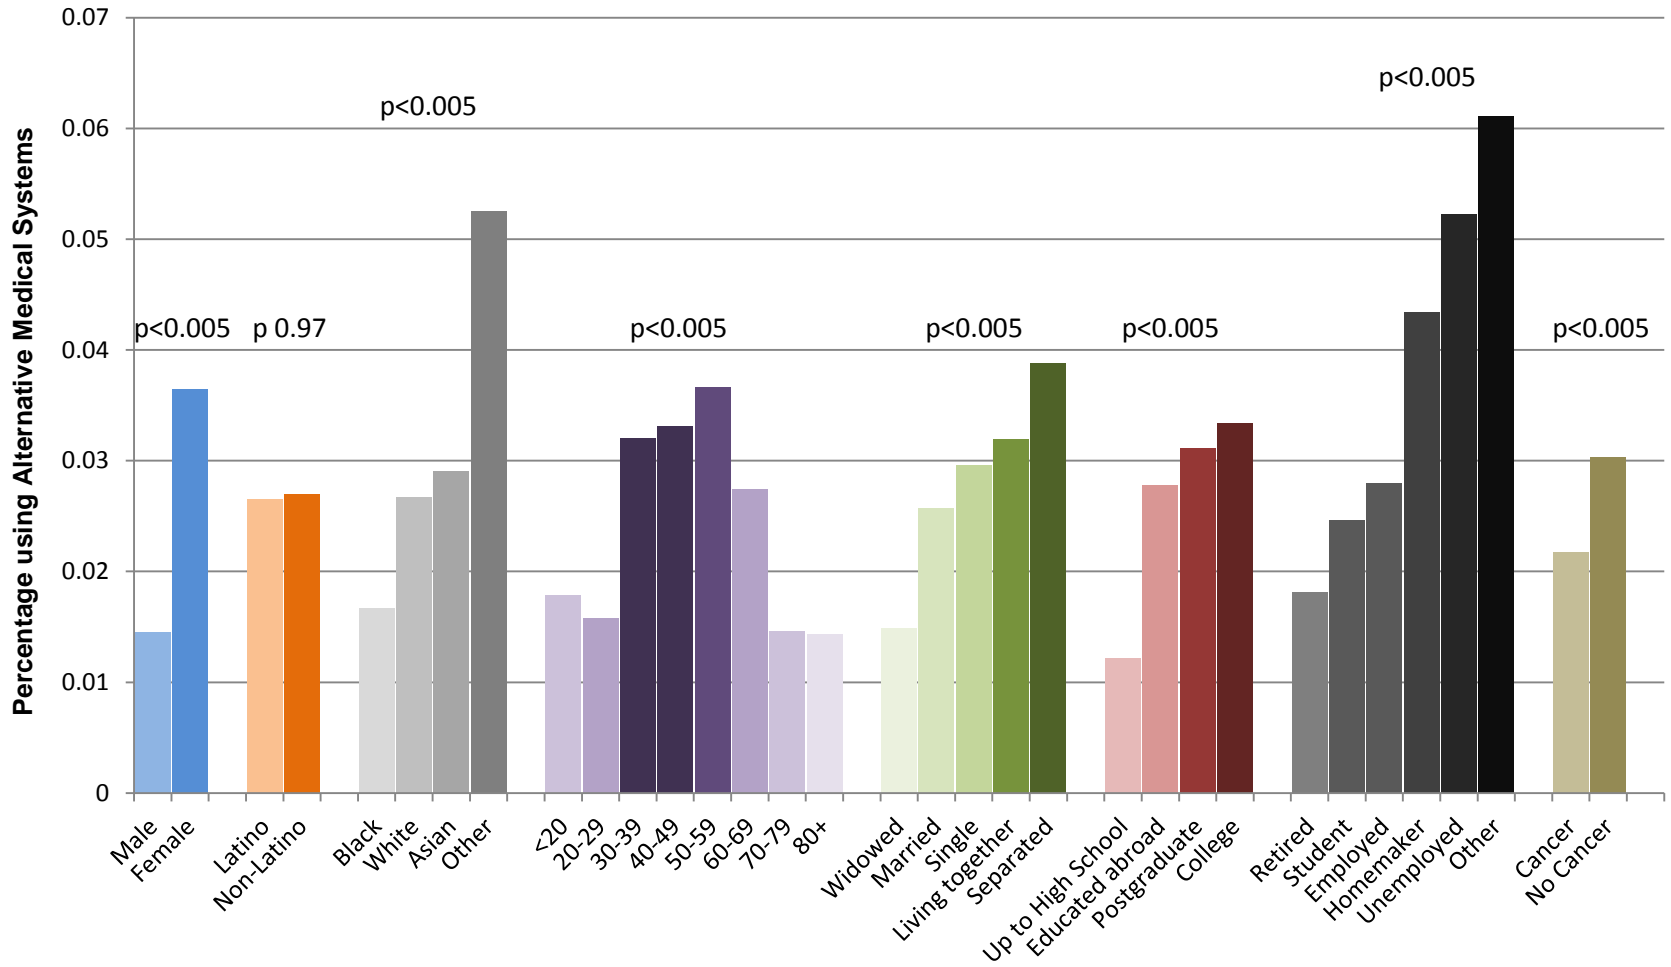

Supplement: Supplementaryfigures.pdf [file Supplementaryfigures.pdf]
